# Supplementary material for: Solving the molecular distance geometry problem with inaccurate distance data
Source: PubMed Central journal article supplement (PMC3698034; doi:10.1186/1471-2105-14-s9-s7), 2013-06-28
Supplement: 1471-2105-14-S9-S7-S1.pdf [file 1471-2105-14-S9-S7-S1.pdf]

---

**Algorithm 1** An iterative algorithm to solve the MDGP with inaccurate data

---

```

1: procedure lsbuild( $V, E, l, u$ )
2:    $D = [d_{ij}] = [t_{ij}l_{ij} + (1 - t_{ij})u_{ij}], \forall (i, j) \in E;$  ▷ Approximated EDM with  $t_{ij} \in [0, 1]$ 
3:    $\mathcal{B} = \text{cliquer}(G(V, E));$  ▷ Initial base (clique).
4:    $U\Sigma U^t = \text{svd}(D')$ , where  $D' = [d_{ij}], \forall (i, j) \in \mathcal{B};$ 
5:   Define  $\tilde{\Sigma}$  as the diagonal matrix with the three biggest eigenvalues of  $\Sigma;$ 
6:   Define  $\tilde{U}$  as the matrix with the columns of  $U$  associated to the eigenvalues in  $\tilde{\Sigma};$ 
7:    $x_j = [\tilde{U}\Sigma^{1/2}]_j, j \in \mathcal{B};$  ▷  $[M]_j$  represents the  $j$ -th row of the matrix  $M.$ 
8:   Refine  $x = [x_j], j \in \mathcal{B}$  using the model given by the eq. (3);
9:    $L = V - \mathcal{B};$  ▷ List of non fixed coordinates.
10:  while  $L$  is not empty do
11:     $K = \{j \in L : \text{node } j \text{ has at least four neighbors in } \mathcal{B}\};$ 
12:    for  $j \in K$  do
13:      Solve the linear system given by the eq. (4);
14:    end for
15:     $L = L - K;$  ▷ Update  $L$ 
16:     $\mathcal{B} = \mathcal{B} \cup K;$  ▷ Update  $\mathcal{B}$ 
17:    Refine  $x = [x_j], j \in \mathcal{B}$  using the model given by the eq. (3);
18:  end while
19: end procedure

```

---
